# Supplementary material for: Genomic analysis of primary plasma cell leukemia reveals complex structural alterations and high-risk mutational patterns
Source: PubMed Central journal article supplement (PMC7303180; doi:10.1038/s41408-020-0336-z), 2020-06-19
Supplement: 41408_2020_336_MOESM1_ESM.pdf [file 41408_2020_336_MOESM1_ESM.pdf]

# **Genomic Analysis of Primary Plasma Cell Leukemia reveals complex Structural Alterations and High Risk Mutational Patterns**

## **Supplementary Material**

**Authors: Carolina Schinke<sup>1</sup>, Eileen M. Boyle<sup>1</sup>, Cody Ashby<sup>1</sup>, Yan Wang<sup>1</sup>, Valeriy Lyzogubov<sup>1</sup>, Christopher Wardell<sup>1</sup>, Pingping Qu<sup>2</sup>, Shayu Deshpande<sup>1</sup>, Katie Ryan<sup>1</sup>, Sharmilan Thanendrarajan<sup>1</sup>, Meera Mohan<sup>1</sup>, Naveen Yarlagadda<sup>1</sup>, Maliha Khan<sup>1</sup>, Samrat Roy Choudhury<sup>1</sup>, Maurizio Zangari<sup>1</sup>, Frits van Rhee<sup>1</sup>, Faith Davies<sup>1</sup>, Bart Barlogie<sup>3</sup>, Gareth Morgan<sup>1</sup> and Brian A. Walker<sup>1,4</sup>**

### **Affiliations:**

1. Myeloma Center, Winthrop P. Rockefeller Cancer Institute, University of Arkansas for Medical Sciences, Little Rock, AR, USA.
2. Cancer Research and Biostatistics, Seattle, WA
3. Department of Hematology and Medical Oncology, Tisch Cancer Institute, Icahn School of Medicine at Mount Sinai, New York, NY
4. Division of Hematology Oncology, School of Medicine, Indiana University, Indiana, IN

### **Corresponding Author: Carolina Schinke and Brian Walker**

**Carolina Schinke, Myeloma Center, University of Arkansas for Medical Sciences, W Markham St, Little Rock, AR 72205. email: cdschinke@uams.edu**

**Brian Walker, Division of Hematology Oncology, Indiana University, IB 544B, 975 W Walnut St, Indianapolis, IN 46202. email: bw75@iu.edu**

**Supplemental Figure 1.** Copy number alterations shown as loss and gain of whole chromosome segments in pPCL (n=23).

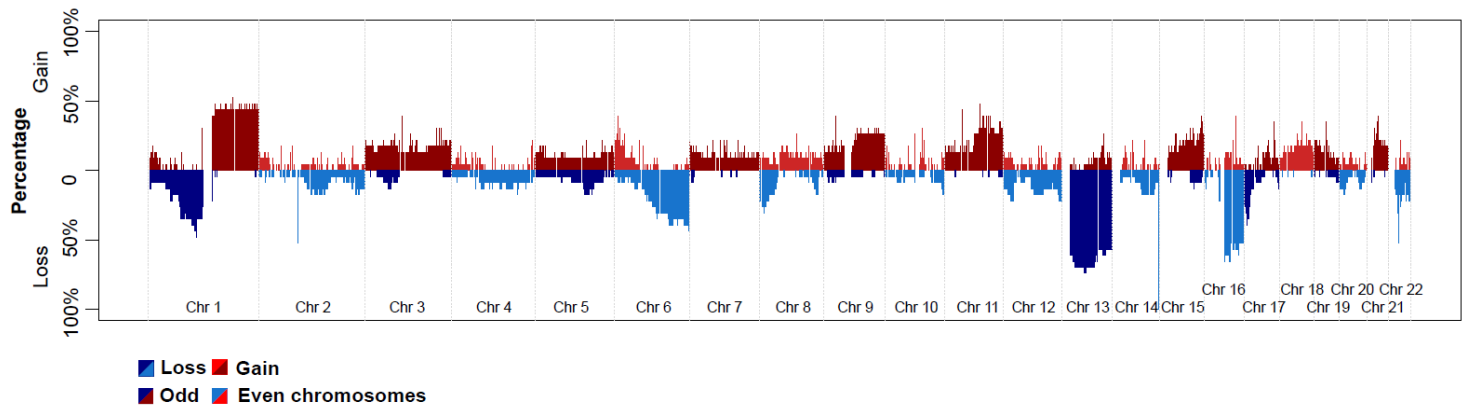

**Supplemental Figure 2.** Copy number alterations in non-hyperdiploid (nHRD) pPCL (n=20) and nHRD MM (n=456) cases.

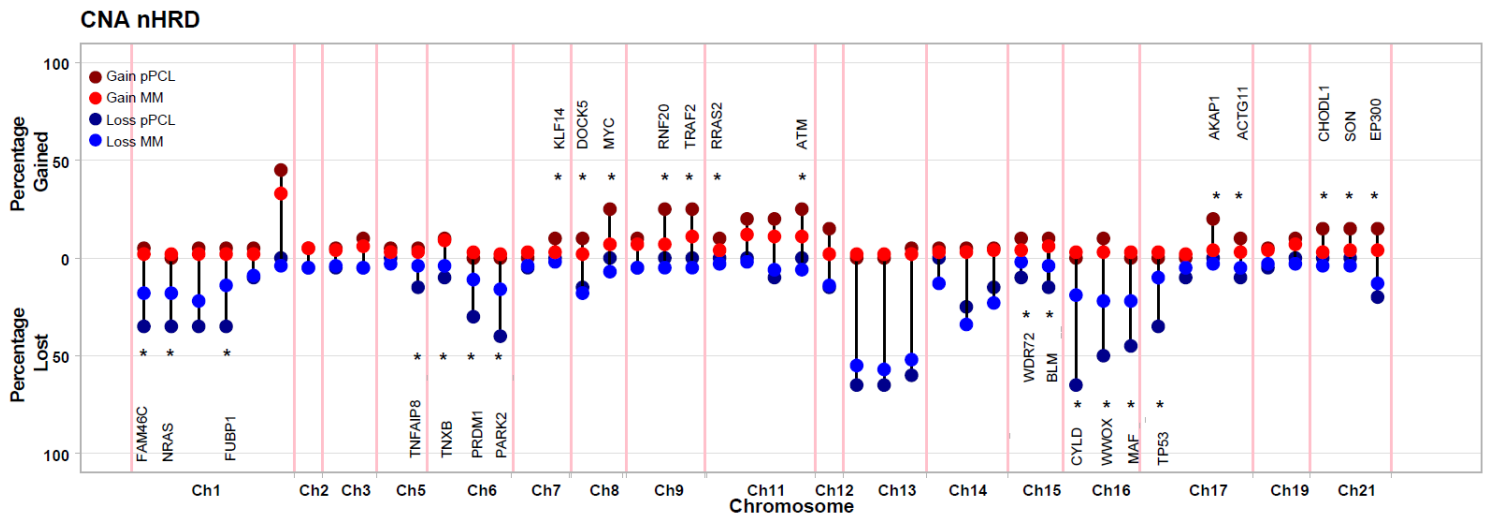

**Supplemental Figure 3.** The prevalence of *KRAS*, *NRAS* and *TP53* mutations per cytogenetic subgroups within this pPCL cohort compared to a previously published MM cohort. Total number of patients within each subgroup were annotated in **Table 1**. Though there are apparent substantial differences between pPCL and MM, these were non-significant given the small sample numbers and after adjusting for sample size.

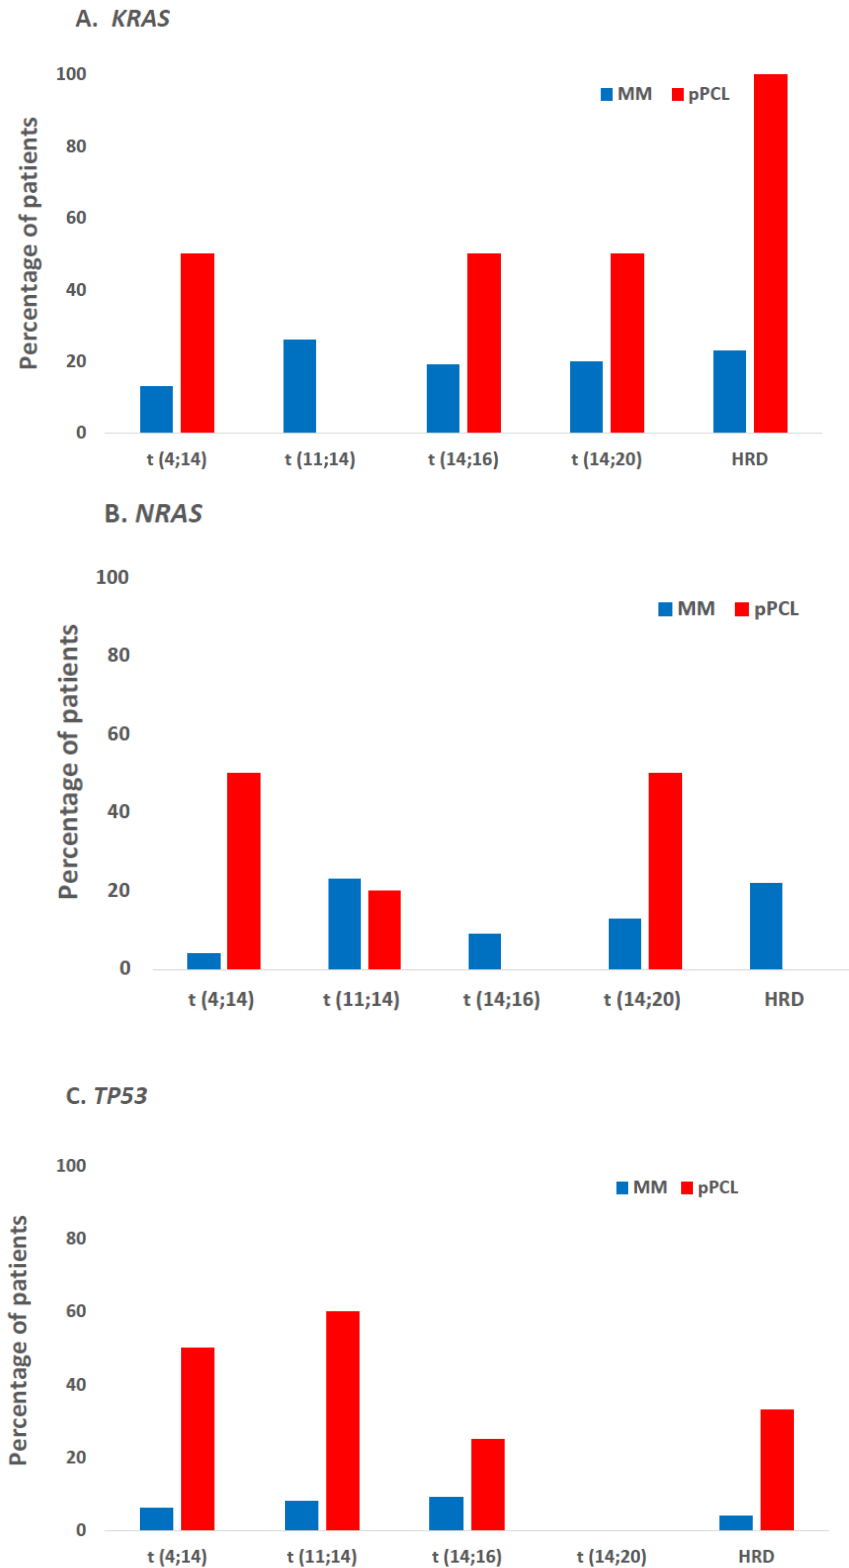

**Supplemental Figure 4.** The prevalence of driver mutations in non-hyperdiploid (nHRD) pPCL (n=20) and nHRD MM (n=456) cases, \* = p<0.05.

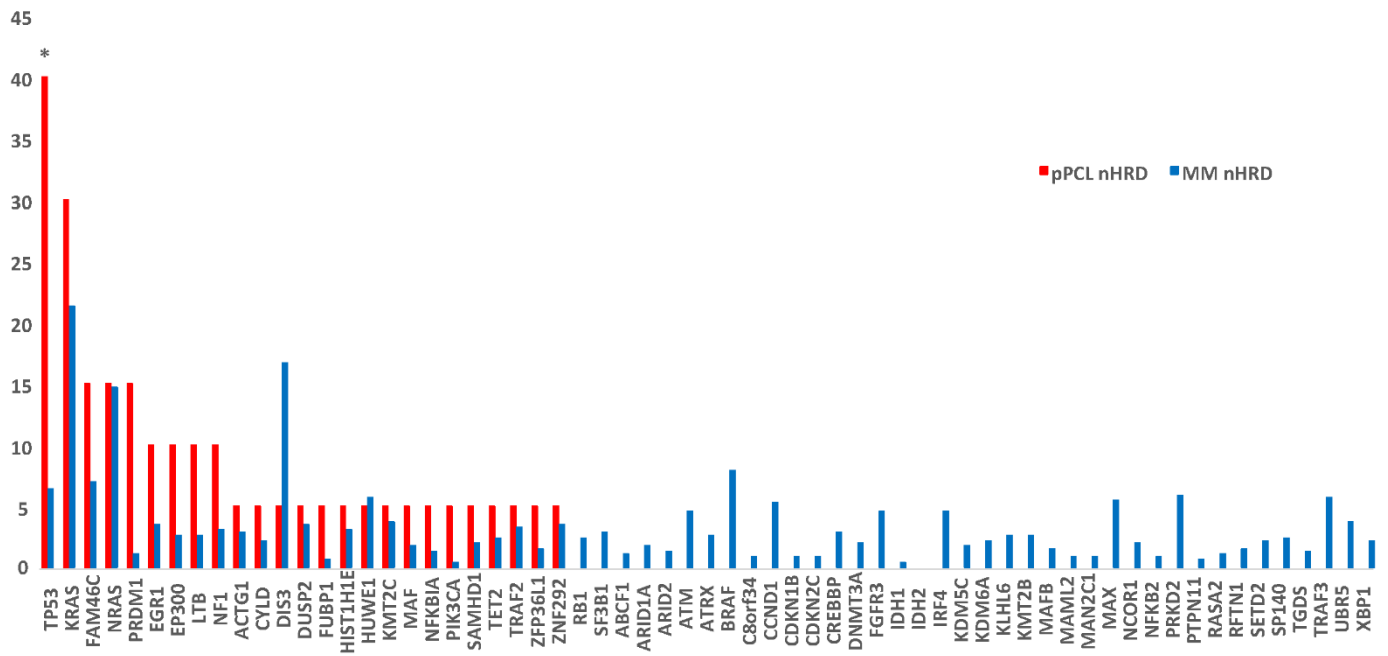

**Supplemental Table 1. Similar Sequencing Methods from different datasets.** This pPCL dataset was compared to previously published MGUS<sup>1</sup> and MM<sup>2,3</sup> datasets, which are available under accession numbers EGAS00001001658, EGAS00001001147 and EGAS00001000036. In brief, tumor load of nonsynonymous mutations was compared between pPCL, MM and MGUS and copy numbers as well as prevalence of previously identified driver mutations were compared between pPCL and MM. Data were filtered similarly to ensure comparability of mutation numbers. The datasets were comparable in terms of sequencing technique, filtering and depth. Of note, the MGUS samples had been sorted using flow then amplified using repli-G. This approach enables better purity and does not create any additional mutations, as shown by Mikulasova et al. Copy number was no longer evaluable therefore requiring additional copy number arrays.

|                 | pPCL                    | MM (MGP)                | MGUS                    |
|-----------------|-------------------------|-------------------------|-------------------------|
| Mean depth      | 90x                     | 107x                    | 67x                     |
| Purity          | >90%                    | >90%                    | Median:99%              |
| Amplification   | No                      | No                      | REPI-g Midi             |
| Reads           | 76-bp paired-ends reads | 76-bp paired-ends reads | 76-bp paired-ends reads |
| Platform        | NextSeq500              | NextSeq 500             | HiSeq 2000              |
| Newly diagnosed | Yes                     | Yes                     | Yes                     |
| Variant calling | Strelka                 | MuTect/Strelka          | MuTect                  |

**Supplemental Table 2. Copy number variations (CNV) between pPCL and MM.** For this analysis, we looked at MM driver genes as previously defined and determined their CNV. Driver genes, whose copy number was altered in at least 2 samples are listed and percentages were compared to a previously published multiple myeloma (MM) dataset<sup>2</sup> using the Chi-Square test.

| Gene           | CHROMOSOME | pPCL Loss % | pPCL Gain % | MM Loss % | MM Gain % | p-value |
|----------------|------------|-------------|-------------|-----------|-----------|---------|
| <i>FAM46C</i>  | 1p12       | 34.8        | 4.3         | 14.5      | 1         | 0.007   |
| <i>NRAS</i>    | 1p13.2     | 34.8        | 4.3         | 15        | 1         | 0.009   |
| <i>RPL5</i>    | 1p22.1     | 34.8        | 4.3         | 18.9      | 0         | 0.01    |
| <i>FUBP1</i>   | 1p31.1     | 34.8        | 4.3         | 13        | 0         | 0.002   |
| <i>CDKN2C</i>  | 1p32.3     | 8.7         | 4.3         | 9         | 1         | 0.8     |
| <i>CKS1B</i>   | 1q21.3     | 0           | 47.8        | 2         | 29.2      | 0.04    |
| <i>DNMT3A</i>  | 2p23.3     | 4.3         | 4.3         | 3.4       | 7         | 0.65    |
| <i>CRBN</i>    | 3p26.2     | 0           | 17.4        | 2         | 33.9      | 0.1     |
| <i>PIK3CA</i>  | 3q26.32    | 0           | 21.7        | 3         | 37        | 0.1     |
| <i>ADCY2</i>   | 5p15.3     | 0           | 17.4        | 1         | 42        | 0.02    |
| <i>TNFAIP8</i> | 5q23.1     | 13          | 13          | 2         | 40.3      | 0.01    |
| <i>TNXB</i>    | 6p21.3     | 4.3         | 13          | 2         | 18.7      | 0.13    |
| <i>PRDM1</i>   | 6q21       | 30.4        | 0           | 11        | 9         | 0.004   |
| <i>PARK2</i>   | 6q26       | 39.1        | 0           | 15.8      | 7         | 0.002   |
| <i>RAPGEF5</i> | 7p15.3     | 0           | 8.7         | 1         | 30.5      | 0.02    |
| <i>KLF14</i>   | 7q32.2     | 0           | 13          | 0         | 31        | 0.06    |
| <i>DOCK5</i>   | 8p21.2     | 17.4        | 8.7         | 19.2      | 1         | 0.7     |
| <i>MYC</i>     | 8q24.2     | 0           | 26.1        | 5         | 7.3       | 0.002   |
| <i>CDKN2A</i>  | 9p21.3     | 4.3         | 17.4        | 2.6       | 48        | 0.004   |
| <i>RNF20</i>   | 9q31.1     | 0           | 30.4        | 1         | 50.7      | 0.1     |
| <i>TRAF2</i>   | 9q34.3     | 0           | 30.4        | 1.5       | 51        | 0.1     |
| <i>RRAS2</i>   | 11p15.2    | 0           | 17.4        | 1         | 32.7      | 0.1     |
| <i>CCND1</i>   | 11q13.3    | 0           | 30.4        | 1         | 38.9      | 0.11    |
| <i>BIRC3</i>   | 11q22.1    | 4.3         | 30.4        | 2.7       | 39        | 0.8     |
| <i>ATM</i>     | 11q22.3    | 0           | 30.4        | 2.3       | 39        | 0.8     |
| <i>CDKN1B</i>  | 12p13.1    | 13          | 13          | 9.9       | 1         | 0.9     |
| <i>BRCA2</i>   | 13q13.1    | 65.2        | 0           | 40.4      | 0         | 0.02    |
| <i>RB1</i>     | 13q14.2    | 69.6        | 0           | 42.4      | 1         | 0.001   |
| <i>DIS3</i>    | 13q21.33   | 69.6        | 4           | 38.6      | 0         | <0.001  |
| <i>FGFR3</i>   | 14p16.3    | 0           | 13          | 7.4       | 5         | 0.6     |
| <i>ABCD4</i>   | 14q24.3    | 21.7        | 4.3         | 22.3      | 2         | 0.9     |
| <i>TRAF3</i>   | 14q32.32   | 13          | 4.3         | 14.9      | 3         | 0.6     |
| <i>WDR72</i>   | 15q21.3    | 4.3         | 21.7        | 0         | 47.7      | 0.01    |
| <i>BLM</i>     | 15q26.1    | 13          | 17.4        | 1         | 47.2      | 0.005   |
| <i>CYLD</i>    | 16q12.1    | 60.9        | 4.3         | 20.4      | 1         | <0.001  |
| <i>WWOX</i>    | 16q23.1    | 56.5        | 4.3         | 23.5      | 1         | <0.001  |
| <i>MAF</i>     | 16q23.2    | 47.8        | 0           | 23        | 5         | 0.005   |
| <i>TP53</i>    | 17p13.1    | 43.5        | 0           | 9         | 5         | <0.001  |
| <i>NF1</i>     | 17q11.2    | 8.7         | 0           | 3         | 6         | 0.26    |
| <i>AKAP1</i>   | 17q22      | 0           | 21.7        | 2         | 9.3       | 0.05    |

|               |         |      |      |   |      |       |
|---------------|---------|------|------|---|------|-------|
| <b>ACTG1</b>  | 17q25.3 | 8.7  | 13   | 3 | 6    | 0.26  |
| <b>ZNF227</b> | 19q13.3 | 4.3  | 13   | 1 | 45.5 | 0.001 |
| <b>ZNF426</b> | 19p13.2 | 0    | 21.7 | 0 | 51.8 | 0.004 |
| <b>CHODL</b>  | 21q21.1 | 0    | 21.7 | 1 | 21.2 | 0.9   |
| <b>SON</b>    | 21q22.1 | 0    | 21.7 | 1 | 22.8 | 0.86  |
| <b>EP300</b>  | 22q13.2 | 17.4 | 4.3  | 9 | 2    | 0.14  |

**Supplemental Table 3. Incidence of biallelic inactivation of known tumor suppressor genes**

| <b>Gene</b>   | <b>pPCL (n=19)</b> | <b>MM (n=1074)*</b> | <b>p- value</b> |
|---------------|--------------------|---------------------|-----------------|
| <i>DIS3</i>   | 2% (1/23)          | 6.4% (69/1074)      | NS              |
| <i>FAM46C</i> | 2% (1/23)          | 4.2% (45/1074)      | NS              |
| <i>RB1</i>    | 2% (1/23)          | 1.7% (18/1074)      | NS              |
| <i>TP53</i>   | 35% (8/23)         | 3.7% (40/1074)      | <0.00001        |



**Supplemental Table 4. Copy number variations (CNV) between non-hyperdiploid (nHRD) pPCL (n=20) and nHRD MM (n=456).** Alterations of copy number variations of driver genes are listed and percentages were compared to a previously published multiple myeloma (MM) dataset<sup>2</sup> using the Chi-Square test.

| Gene           | CHROMOSOME | pPCL Loss % | pPCL Gain % | MM Loss % | MM Gain % | p-value |
|----------------|------------|-------------|-------------|-----------|-----------|---------|
| <i>FAM46C</i>  | 1p12       | 35          | 5           | 16        | 0         | 0.03    |
| <i>NRAS</i>    | 1p13.2     | 35          | 0           | 16        | 0         | 0.03    |
| <i>RPL5</i>    | 1p22.1     | 35          | 5           | 20        | 0         | 0.1     |
| <i>FUBP1</i>   | 1p31.1     | 35          | 5           | 12        | 0         | 0.003   |
| <i>CDKN2C</i>  | 1p32.3     | 10          | 5           | 7         | 0         | 0.6     |
| <i>CKS1B</i>   | 1q21.3     | 0           | 45          | 2         | 31        | 0.2     |
| <i>DNMT3A</i>  | 2p23.3     | 5           | 5           | 3         | 3         | 0.7     |
| <i>CRBN</i>    | 3p26.2     | 5           | 5           | 2         | 2         | 0.4     |
| <i>PIK3CA</i>  | 3q26.32    | 5           | 10          | 3         | 4         | 0.3     |
| <i>ADCY2</i>   | 5p15.3     | 0           | 5           | 1         | 1         | 0.2     |
| <i>TNFAIP8</i> | 5q23.1     | 15          | 5           | 2         | 1         | 0.002   |
| <i>TNXB</i>    | 6p21.3     | 10          | 10          | 2         | 7         | 0.02    |
| <i>PRDM1</i>   | 6q21       | 30          | 0           | 9         | 1         | 0.002   |
| <i>PARK2</i>   | 6q26       | 40          | 0           | 14        | 0         | 0.002   |
| <i>RAPGEF5</i> | 7p15.3     | 5           | 0           | 2         | 1         | 0.4     |
| <i>KLF14</i>   | 7q32.2     | 0           | 10          | 0         | 1         | 0.001   |
| <i>DOCK5</i>   | 8p21.2     | 15          | 10          | 16        | 0         | <0.001  |
| <i>MYC</i>     | 8q24.2     | 0           | 25          | 5         | 5         | <0.001  |
| <i>CDKN2A</i>  | 9p21.3     | 5           | 10          | 3         | 5         | 0.3     |
| <i>RNF20</i>   | 9q31.1     | 0           | 25          | 3         | 5         | <0.001  |
| <i>TRAF2</i>   | 9q34.3     | 0           | 25          | 3         | 9         | 0.02    |
| <i>RRAS2</i>   | 11p15.2    | 0           | 10          | 1         | 2         | 0.02    |
| <i>CCND1</i>   | 11q13.3    | 0           | 20          | 0         | 10        | 0.2     |
| <i>BIRC3</i>   | 11q22.1    | 10          | 20          | 4         | 9         | 0.1     |
| <i>ATM</i>     | 11q22.3    | 0           | 25          | 4         | 9         | 0.02    |
| <i>CDKN1B</i>  | 12p13.1    | 15          | 15          | 12        | 0         | NS      |
| <i>BRCA2</i>   | 13q13.1    | 65          | 0           | 53        | 0         | 0.3     |
| <i>RB1</i>     | 13q14.2    | 65          | 0           | 55        | 0         | NS      |
| <i>DIS3</i>    | 13q21.33   | 60          | 5           | 50        | 0         | NS      |
| <i>FGFR3</i>   | 14p16.3    | 0           | 5           | 11        | 1         | NS      |
| <i>ABCD4</i>   | 14q24.3    | 25          | 5           | 32        | 1         | NS      |
| <i>TRAF3</i>   | 14q32.32   | 15          | 5           | 21        | 2         | NS      |
| <i>WDR72</i>   | 15q21.3    | 10          | 10          | 0         | 2         | 0.03    |
| <i>BLM</i>     | 15q26.1    | 15          | 10          | 2         | 4         | <0.001  |
| <i>CYLD</i>    | 16q12.1    | 65          | 0           | 17        | 1         | <0.001  |
| <i>WWOX</i>    | 16q23.1    | 50          | 10          | 20        | 1         | <0.001  |
| <i>MAF</i>     | 16q23.2    | 45          | 0           | 20        | 1         | 0.002   |
| <i>TP53</i>    | 17p13.1    | 35          | 0           | 8         | 1         | <0.001  |
| <i>NF1</i>     | 17q11.2    | 10          | 0           | 3         | 0         | 0.09    |
| <i>AKAP1</i>   | 17q22      | 0           | 20          | 1         | 2         | <0.001  |
| <i>ACTG1</i>   | 17q25.3    | 10          | 10          | 3         | 1         | 0.001   |

|               |         |    |    |    |   |        |
|---------------|---------|----|----|----|---|--------|
| <b>ZNF227</b> | 19q13.3 | 5  | 5  | 1  | 2 | NS     |
| <b>ZNF426</b> | 19p13.2 | 0  | 10 | 1  | 5 | NS     |
| <b>CHODL</b>  | 21q21.1 | 0  | 15 | 2  | 1 | <0.001 |
| <b>SON</b>    | 21q22.1 | 0  | 15 | 2  | 2 | <0.001 |
| <b>EP300</b>  | 22q13.2 | 20 | 15 | 11 | 2 | <0.001 |

**Supplemental Table 5.** Codons affected by nonsynonymous mutations in *KRAS* and *TP53* of pPCL patients compared to MM. No significant differences were observed.

**A. *KRAS***

| Codon | pPCL (n=9) | MM (n=305)    |
|-------|------------|---------------|
| G12D  | 22% (2/9)  | 13% (40/305)  |
| G12A  | 11% (1/9)  | 5.6% (17/305) |
| Q61H  | 11% (1/9)  | 23% (69/305)  |
| K117N | 11% (1/9)  | 2.3% (7/305)  |
| M67I  | 11% (1/9)  | 0% (0/305)    |
| A59E  | 11% (1/9)  | 0.32% (1/305) |
| L19F  | 11% (1/9)  | 0.7% (2/305)  |
| A146V | 11% (1/9)  | 2.3% (7/305)  |

**B. *TP53***

| Codon | pPCL (n=11) | MM (n=81) |
|-------|-------------|-----------|
| E294  | 9% (1/11)   | 0% (0/81) |
| R267W | 9% (1/11)   | 2% (2/81) |
| R280K | 9% (1/11)   | 1% (1/81) |
| R248W | 9% (1/11)   | 1% (1/81) |
| L194F | 9% (1/11)   | 0% (0/81) |
| G245S | 9% (1/11)   | 0% (0/81) |
| G279E | 9% (1/11)   | 0% (0/81) |
| V272M | 9% (1/11)   | 0% (0/81) |
| L344P | 9% (1/11)   | 0% (0/81) |
| Y234H | 9% (1/11)   | 1% (1/81) |
| C277  | 9% (1/11)   | 0% (0/81) |

**Supplemental Table 6.** A total of 126 gene probes were found differentially expressed with at least a 2 fold change between newly diagnosed pPCL and non-pPCL MM (FDR<0.01 and P<0.05)

**24 significantly up-regulated genes** in pPCL are listed below:

| probe        | gene_symbol | chrom_loc   | meanMM | meanpPCL | foldchg |
|--------------|-------------|-------------|--------|----------|---------|
| 200916_at    | TAGLN2      | chr1q23.2   | 9.86   | 12.49    | 3.99    |
| 210978_s_at  | TAGLN2      | chr1q23.2   | 10.12  | 12.18    | 3.26    |
| 232231_at    | RUNX2       | chr6p21.1   | 8.34   | 10.06    | 3.20    |
| 210916_s_at  | CD44        | chr11p13    | 9.14   | 10.54    | 2.75    |
| 227212_s_at  | PHF19       | chr9q33.2   | 8.38   | 10.07    | 2.74    |
| 209118_s_at  | TUBA1A      | chr12q13.12 | 8.34   | 10.38    | 2.69    |
| 226961_at    | PRR15       | chr7p14.3   | 9.15   | 10.17    | 2.69    |
| 1554600_s_at | LMNA        | chr1q22     | 8.78   | 10.43    | 2.56    |
| 200872_at    | S100A10     | chr1q21.3   | 11.09  | 12.71    | 2.47    |
| 211986_at    | AHNAK       | chr11q12.3  | 10.94  | 12.63    | 2.46    |
| 212014_x_at  | CD44        | chr11p13    | 10.26  | 11.47    | 2.34    |
| 1557905_s_at | CD44        | chr11p13    | 10.10  | 11.20    | 2.34    |
| 201012_at    | ANXA1       | chr9q21.13  | 8.36   | 9.59     | 2.23    |
| 209835_x_at  | CD44        | chr11p13    | 10.53  | 11.68    | 2.23    |
| 227211_at    | PHF19       | chr9q33.2   | 8.13   | 9.81     | 2.18    |
| 217763_s_at  | RAB31       | chr18p11.22 | 7.83   | 9.18     | 2.16    |
| 204490_s_at  | CD44        | chr11p13    | 10.07  | 11.15    | 2.15    |
| 206632_s_at  | APOBEC3B    | chr22q13.1  | 9.58   | 11.04    | 2.12    |
| 217523_at    | CD44        | chr11p13    | 7.54   | 8.61     | 2.09    |
| 208622_s_at  | EZR         | chr6q25.3   | 10.99  | 12.13    | 2.08    |
| 209083_at    | CORO1A      | chr16p11.2  | 11.19  | 12.52    | 2.03    |
| 240983_s_at  | CARS        | chr11p15.4  | 9.22   | 10.12    | 2.03    |
| 208621_s_at  | EZR         | chr6q25.3   | 10.44  | 11.51    | 2.03    |
| 200859_x_at  | FLNA        | chrXq28     | 9.68   | 11.08    | 2.01    |

**102 significantly down-regulated genes** in pPCL are listed below:

| probe       | gene_symbol | chrom_loc   | meanMM | meanpPCL | foldchg |
|-------------|-------------|-------------|--------|----------|---------|
| 214146_s_at | PPBP        | chr4q13.3   | 9.20   | 6.36     | 6.35    |
| 215049_x_at | CD163       | chr12p13.31 | 8.05   | 5.54     | 5.12    |
| 209116_x_at | HBB         | chr11p15.4  | 11.39  | 8.98     | 4.76    |
| 203868_s_at | VCAM1       | chr1p21.2   | 9.28   | 6.90     | 4.68    |
| 203645_s_at | CD163       | chr12p13.31 | 8.59   | 6.34     | 4.27    |
| 211696_x_at | HBB         | chr11p15.4  | 12.13  | 9.97     | 4.09    |

|             |                                                                                                                        |             |       |       |      |
|-------------|------------------------------------------------------------------------------------------------------------------------|-------------|-------|-------|------|
| 217232_x_at | HBB                                                                                                                    | chr11p15.4  | 11.83 | 9.79  | 3.78 |
| 209687_at   | CXCL12                                                                                                                 | chr10q11.21 | 8.66  | 7.24  | 3.55 |
| 203698_s_at | FRZB                                                                                                                   | chr2q32.1   | 11.27 | 8.49  | 3.45 |
| 225353_s_at | C1QC                                                                                                                   | chr1p36.12  | 8.55  | 6.76  | 3.39 |
| 217378_x_at | AC016745.2 /// OTTHUMG00000153338                                                                                      | chr2q13     | 12.35 | 10.31 | 3.29 |
| 201427_s_at | SEPP1                                                                                                                  | chr5p12     | 11.78 | 10.08 | 3.10 |
| 213975_s_at | LYZ                                                                                                                    | chr8p11.21  | 8.96  | 7.39  | 3.06 |
| 227265_at   | FGL2                                                                                                                   | chr7q11.23  | 8.33  | 7.36  | 3.02 |
| 216834_at   | RGS1                                                                                                                   | chr1q31.2   | 11.38 | 10.09 | 2.99 |
| 234415_x_at | —                                                                                                                      | —           | 9.94  | 7.96  | 2.91 |
| 203697_at   | FRZB                                                                                                                   | chr2q32.1   | 11.92 | 9.63  | 2.87 |
| 223343_at   | MS4A7                                                                                                                  | chr11q12.2  | 8.11  | 6.64  | 2.76 |
| 229819_at   | A1BG                                                                                                                   | chr19q13.43 | 7.75  | 6.09  | 2.76 |
| 206111_at   | RNASE2                                                                                                                 | chr14q11.2  | 8.93  | 7.42  | 2.75 |
| 211633_x_at | —                                                                                                                      | chr14q32.33 | 10.08 | 8.15  | 2.74 |
| 225207_at   | PDK4                                                                                                                   | chr7q21.3   | 8.19  | 7.01  | 2.69 |
| 211474_s_at | SERPINB6                                                                                                               | chr1p34.1   | 10.37 | 8.99  | 2.67 |
| 226818_at   | MPEG1                                                                                                                  | chr11q12.1  | 9.26  | 7.70  | 2.67 |
| 224724_at   | SULF2                                                                                                                  | chr20q13.12 | 11.89 | 8.71  | 2.66 |
| 203535_at   | S100A9                                                                                                                 | chr1q21.3   | 8.15  | 6.87  | 2.65 |
| 217480_x_at | AC127391.1 /// AC128677.4 /// IGKV1OR-2 /// IGKV1OR10-1 /// IGKV1OR2-118 /// OTTHUMG00000155081 /// OTTHUMG00000155090 | chr10q11.21 | 12.63 | 10.94 | 2.64 |
| 214719_at   | SLC46A3                                                                                                                | chr13q12.3  | 8.86  | 7.35  | 2.61 |
| 205033_s_at | DEFA1 /// DEFA1B /// DEFA3                                                                                             | chr8p23.1   | 9.19  | 7.87  | 2.60 |
| 202252_at   | RAB13                                                                                                                  | chr1q21.3   | 10.27 | 8.76  | 2.59 |
| 202988_s_at | RGS1                                                                                                                   | chr1q31.2   | 10.01 | 8.93  | 2.59 |
| 208983_s_at | PECAM1                                                                                                                 | —           | 12.38 | 10.55 | 2.57 |
| 217179_x_at | —                                                                                                                      | chr22q11.22 | 10.92 | 9.31  | 2.53 |
| 219525_at   | SLC47A1                                                                                                                | chr17p11.2  | 9.49  | 7.29  | 2.52 |
| 205863_at   | S100A12                                                                                                                | chr1q21.3   | 8.27  | 7.06  | 2.51 |
| 226841_at   | MPEG1                                                                                                                  | chr11q12.1  | 7.98  | 6.65  | 2.50 |
| 202768_at   | FOSB                                                                                                                   | chr19q13.32 | 11.17 | 9.95  | 2.48 |
| 237561_x_at | —                                                                                                                      | chr19p13.12 | 8.87  | 6.94  | 2.48 |
| 202917_s_at | S100A8                                                                                                                 | chr1q21.3   | 10.85 | 9.66  | 2.44 |
| 208146_s_at | CPVL                                                                                                                   | chr7p14.3   | 8.67  | 7.06  | 2.44 |
| 209771_x_at | CD24                                                                                                                   | chrYq11.222 | 8.04  | 6.87  | 2.43 |

|              |                                                                                                        |             |       |       |      |
|--------------|--------------------------------------------------------------------------------------------------------|-------------|-------|-------|------|
| 233555_s_at  | SULF2                                                                                                  | chr20q13.12 | 10.58 | 7.56  | 2.43 |
| 203665_at    | HMOX1                                                                                                  | chr22q12.3  | 9.48  | 8.29  | 2.41 |
| 235666_at    | ITGA8                                                                                                  | chr10p13    | 11.48 | 10.01 | 2.36 |
| 211990_at    | HLA-DPA1                                                                                               | chr6p21.32  | 10.68 | 9.24  | 2.36 |
| 204670_x_at  | HLA-DRB1 /// HLA-DRB4 ///<br>LOC100507709 /// LOC100507714                                             | chr6p21.32  | 9.83  | 8.59  | 2.32 |
| 206834_at    | HBD                                                                                                    | chr11p15.4  | 10.05 | 8.45  | 2.32 |
| 223044_at    | SLC40A1                                                                                                | chr2q32.2   | 11.00 | 10.14 | 2.31 |
| 203381_s_at  | APOE                                                                                                   | chr19q13.32 | 8.69  | 7.42  | 2.30 |
| 232745_x_at  | SPEF2                                                                                                  | chr5p13.2   | 7.79  | 6.22  | 2.30 |
| 228592_at    | MS4A1                                                                                                  | chr11q12.2  | 8.71  | 8.00  | 2.29 |
| 209035_at    | MDK                                                                                                    | chr11p11.2  | 9.31  | 8.33  | 2.28 |
| 206460_at    | AJAP1                                                                                                  | chr1p36.32  | 7.80  | 5.71  | 2.28 |
| 210517_s_at  | AKAP12                                                                                                 | chr6q25.1   | 8.29  | 6.56  | 2.26 |
| 1556499_s_at | COL1A1                                                                                                 | chr17q21.33 | 7.74  | 6.26  | 2.25 |
| 241834_at    | IPW /// LOC100506948 /// SNORD107 ///<br>SNORD115-13 /// SNORD115-26 ///<br>SNORD115-7 /// SNORD116-28 | chr15q11.2  | 6.27  | 5.01  | 2.24 |
| 225102_at    | MGLL                                                                                                   | chr3q21.3   | 8.92  | 8.08  | 2.24 |
| 208981_at    | PECAM1                                                                                                 | chr17q23.3  | 13.09 | 11.61 | 2.23 |
| 208982_at    | PECAM1                                                                                                 | chr17q23.3  | 13.49 | 12.02 | 2.23 |
| 226743_at    | SLFN11                                                                                                 | chr17q12    | 10.25 | 8.80  | 2.23 |
| 206207_at    | CLC                                                                                                    | chr19q13.2  | 8.65  | 7.57  | 2.21 |
| 229800_at    | DCLK1                                                                                                  | chr13q13.3  | 7.30  | 5.85  | 2.21 |
| 219888_at    | SPAG4                                                                                                  | chr20q11.22 | 12.18 | 10.80 | 2.19 |
| 201278_at    | DAB2                                                                                                   | chr5p13.1   | 8.08  | 6.76  | 2.19 |
| 201137_s_at  | HLA-DPB1                                                                                               | chr6p21.32  | 9.15  | 7.97  | 2.19 |
| 202388_at    | RGS2                                                                                                   | chr1q31.2   | 12.13 | 10.98 | 2.17 |
| 244419_at    | FRZB                                                                                                   | chr2q32.1   | 8.12  | 6.46  | 2.17 |
| 222943_at    | GBA3                                                                                                   | chr4p15.2   | 9.69  | 7.69  | 2.17 |
| 228375_at    | IGSF11                                                                                                 | chr3q13.32  | 8.42  | 6.89  | 2.16 |
| 210744_s_at  | IL5RA                                                                                                  | chr3p26.2   | 9.93  | 7.67  | 2.16 |
| 209312_x_at  | HLA-DRB1 /// HLA-DRB4 /// HLA-DRB5 ///<br>LOC100507709 /// LOC100507714                                | chr6p21.32  | 10.17 | 8.98  | 2.15 |
| 204834_at    | FGL2                                                                                                   | chr7q11.23  | 9.02  | 8.37  | 2.15 |
| 225214_at    | LOC100129034                                                                                           | chr9q33.3   | 9.17  | 7.82  | 2.15 |
| 214265_at    | ITGA8                                                                                                  | chr10p13    | 10.72 | 9.36  | 2.14 |
| 210314_x_at  | TNFSF13                                                                                                | chr17p13.1  | 8.45  | 7.49  | 2.13 |

|             |                                               |             |       |       |      |
|-------------|-----------------------------------------------|-------------|-------|-------|------|
| 206121_at   | AMPD1                                         | chr1p13.2   | 11.87 | 10.48 | 2.12 |
| 220330_s_at | SAMSN1                                        | chr21q11.2  | 10.52 | 9.59  | 2.12 |
| 226809_at   | LOC100216479 /// LOC100996884                 | chr2q21.1   | 7.44  | 6.76  | 2.11 |
| 222450_at   | PMEPA1                                        | chr20q13.31 | 10.26 | 9.10  | 2.11 |
| 235400_at   | FCRLA                                         | chr1q23.3   | 11.51 | 10.70 | 2.11 |
| 230951_at   | EPB41L5                                       | chr2q14.2   | 6.38  | 5.38  | 2.10 |
| 208306_x_at | HLA-DRB1 /// LOC100507709 ///<br>LOC100507714 | chr6p21.32  | 9.79  | 8.71  | 2.10 |
| 206150_at   | CD27                                          | chr12p13.31 | 11.09 | 9.66  | 2.10 |
| 202973_x_at | FAM13A                                        | chr4q22.1   | 11.56 | 10.22 | 2.08 |
| 228153_at   | RNF144B                                       | chr6p22.3   | 9.56  | 8.26  | 2.08 |
| 200665_s_at | SPARC                                         | chr5q33.1   | 9.02  | 7.79  | 2.08 |
| 1558397_at  | PECAM1                                        | chr17q23.3  | 9.63  | 8.23  | 2.07 |
| 219799_s_at | DHRS9                                         | chr2q31.1   | 10.47 | 9.15  | 2.07 |
| 205049_s_at | CD79A                                         | chr19q13.2  | 10.66 | 9.22  | 2.07 |
| 244632_at   | CNTN5                                         | chr11q22.1  | 7.51  | 5.98  | 2.05 |
| 227404_s_at | EGR1                                          | chr5q31.2   | 12.05 | 10.84 | 2.05 |
| 220059_at   | STAP1                                         | chr4q13.2   | 11.24 | 9.68  | 2.03 |
| 202437_s_at | CYP1B1                                        | chr2p22.2   | 6.40  | 5.33  | 2.03 |
| 204058_at   | ME1                                           | chr6q14.2   | 7.35  | 6.23  | 2.03 |
| 226051_at   | SELM                                          | chr22q12.2  | 12.28 | 11.11 | 2.02 |
| 241617_x_at | —                                             | —           | 8.19  | 7.04  | 2.02 |
| 209189_at   | FOS                                           | chr14q24.3  | 12.91 | 11.98 | 2.02 |
| 201656_at   | ITGA6                                         | chr2q31.1   | 11.33 | 9.88  | 2.01 |
| 202648_at   | TCF3                                          | chr20p11.23 | 7.86  | 6.77  | 2.01 |
| 224009_x_at | DHRS9                                         | chr2q31.1   | 10.32 | 9.01  | 2.01 |
| 227834_at   | TXLNB                                         | chr6q24.1   | 8.11  | 7.07  | 2.00 |
| 203988_s_at | FUT8                                          | chr14q23.3  | 10.93 | 9.23  | 2.00 |

## References

1. Mikulasova A, Wardell CP, Murison A, et al. The spectrum of somatic mutations in monoclonal gammopathy of undetermined significance indicates a less complex genomic landscape than that in multiple myeloma. *Haematologica*. 2017;102(9):1617-1625.
2. Walker BA, Mavrommatis K, Wardell CP, et al. Identification of novel mutational drivers reveals oncogene dependencies in multiple myeloma. *Blood*. 2018;132(6):587-597.
3. Walker BA, Mavrommatis K, Wardell CP, et al. A high-risk, Double-Hit, group of newly diagnosed myeloma identified by genomic analysis. *Leukemia*. 2019;33(1):159-170.
